# Supplementary material for: Investigation of the physical, optical, and chemical properties of phase segregated AlCoOx thin films from a novel hexol-type cluster
Source: Royal Society of Chemistry journal article supplement (doi:10.1039/d0dt03899g), 2021-01-01
Supplement: d0dt03899g1.pdf [file d0dt03899g1.pdf]

# Supporting Information

## Investigation of the physical, optical, and chemical properties of phase segregated AlCoO<sub>x</sub> thin films from a novel hexol-type cluster

Jordan D. Levine,<sup>a</sup> Meredith C. Sharps,<sup>a</sup> Elizabeth A. Cochran,<sup>a</sup> David A Marsh,<sup>a</sup>  
William H. Casey,<sup>b</sup> Darren W. Johnson\*

<sup>a</sup>*Department of Chemistry & Biochemistry and Materials Science Institute, University of Oregon, Eugene, Oregon 97403-1253*  
*Email: jlevine2@uoregon.edu*

<sup>b</sup>*Department of Chemistry, University of California, Davis, California 95616.*

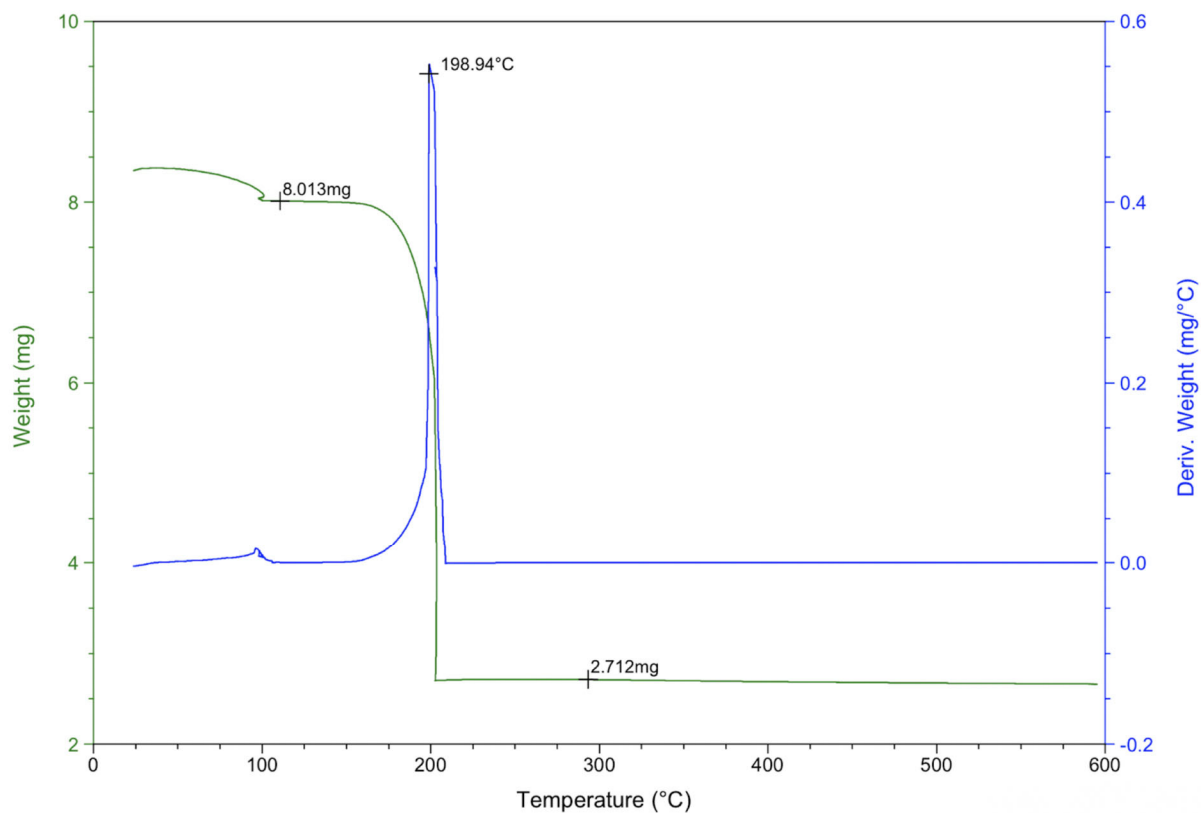

Figure S1. Thermogravimetric analysis (TGA) of **CoAl** precursor. Mass loss event at 198.94 °C correlates to the decomposition of the outersphere nitrate groups and ammine ligands.

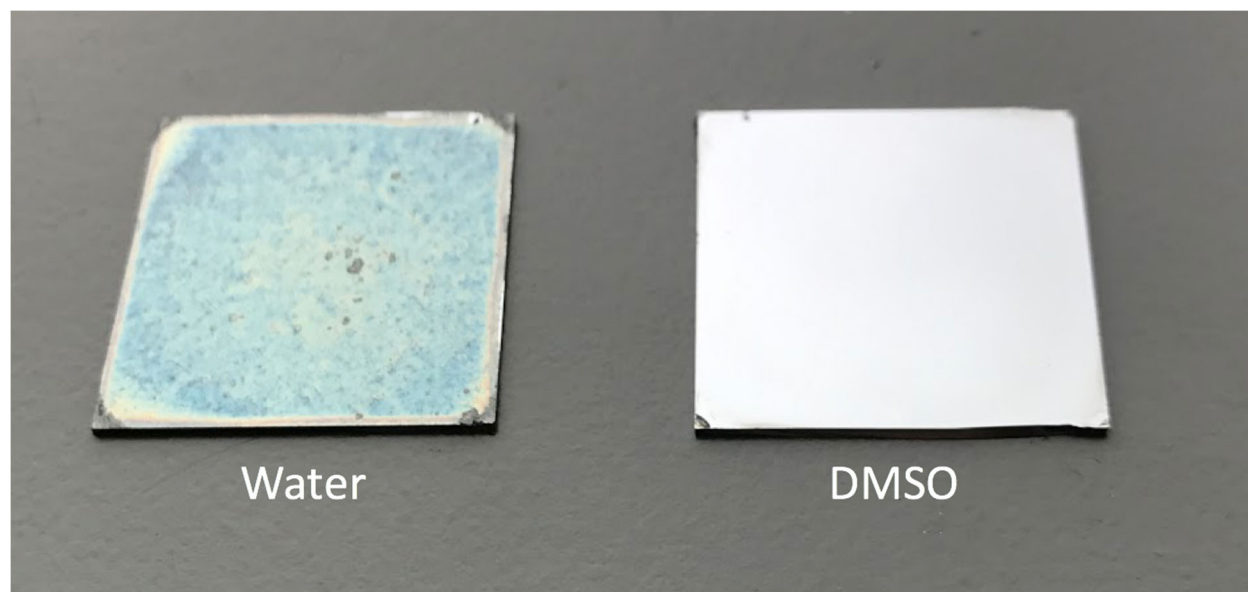

Figure S2. **CoAl** films fabricated from water (left) and DMSO (right). After spin coating and soft bake at 250 °C films from water had significant surface defects compared to ones from DMSO.

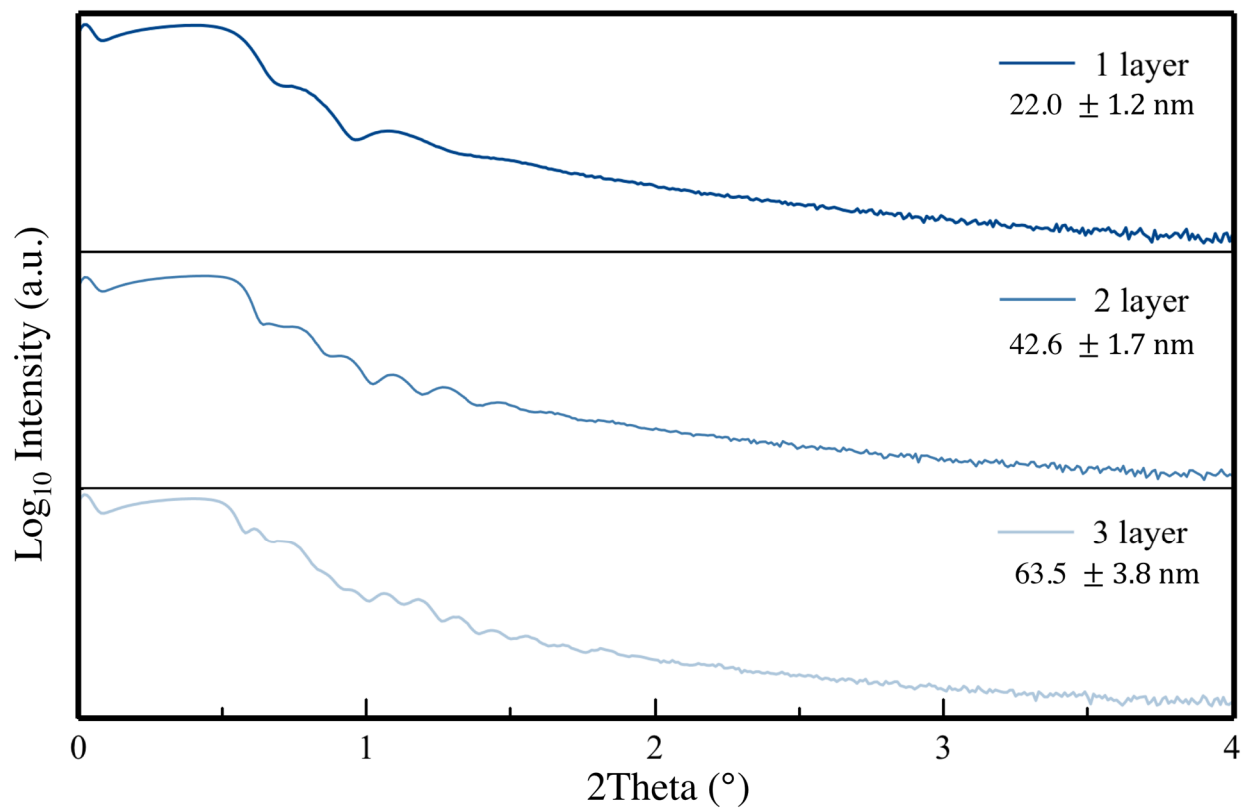

Figure S3. XRR diffraction pattern of 1-layer, 2-layer, and 3-layer **CoAl** films annealed in box furnace at 700 °C with corresponding film thicknesses.

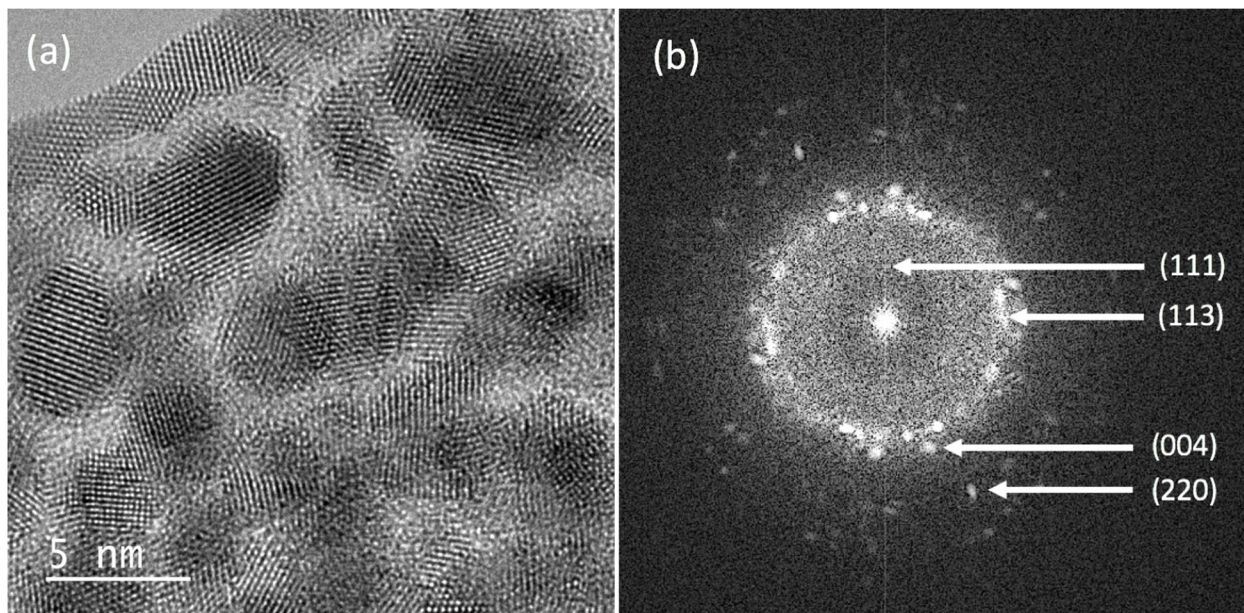

Figure S4 TEM image of 1-layer **CoAl** film annealed at 800°C (a) and corresponding electron diffraction pattern (b) showing the (111), (113), (004), and (220) reflections of  $\text{Co}_3\text{O}_4$ .

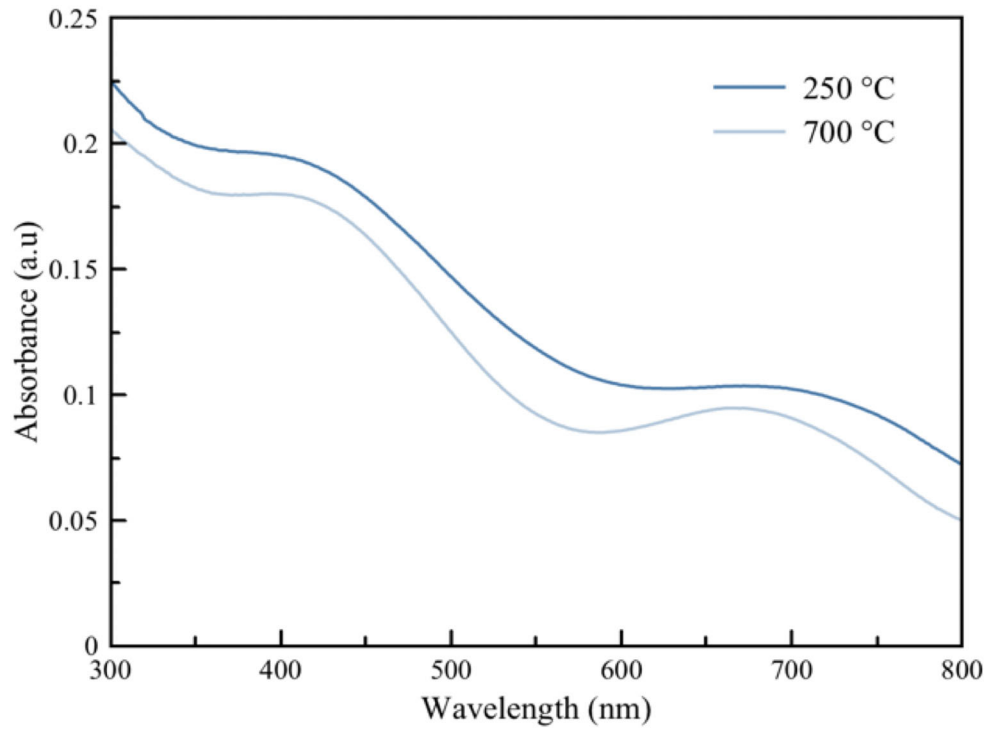

Figure S5. UV-Vis spectra of 1-layer **CoAl** film after hot plate anneal at 250 °C and subsequent box furnace anneal at 700 °C.
